# Supplementary material
Source: Springer Nature journal article supplement (https://www.springermedizin.de/resource/supplementary/12889_2013_6577_MOESM2_ESM.pdf/9498546)

p for interaction = 0.007

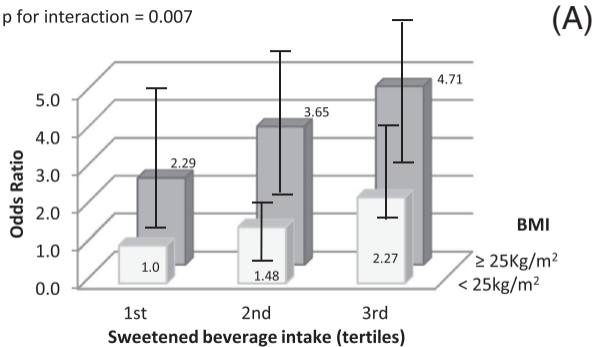

p for interaction = 0.791

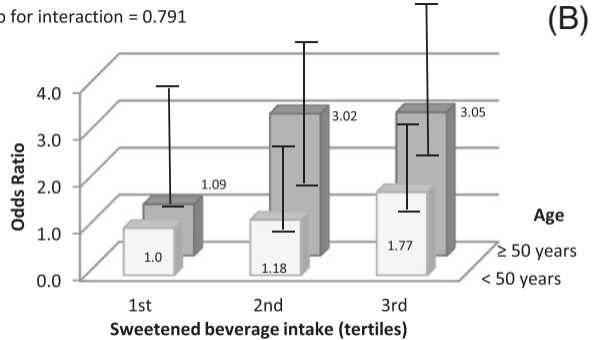

Supplement: MOESM2 [file 9498546]
